# Supplementary material
Source: ML conference proceedings conference paper supplement (https://openaccess.thecvf.com/content/CVPR2024/html/Wang_Inverse_Rendering_of_CVPR_2024_paper.html)
Supplement: Supplementary file 2 [file Wang_Inverse_Rendering_of_CVPR_2024_supplemental.zip]

Archive with 15 entries (15 files):
- compare1-albedo.mp4
- compare1-diffuse.mp4
- compare1-lighting.mp4
- compare1-metallic.mp4
- compare1-normal.mp4
- compare1-rgb.mp4
- compare1-roughness.mp4
- compare2-albedo.mp4
- compare2-diffuse.mp4
- compare2-lighting.mp4
- compare2-metallic.mp4
- compare2-normal.mp4
- compare2-rgb.mp4
- compare2-roughness.mp4
- supp.pdf
